# Supplementary material for: Extending interstitial tetrelides into carbides: synthesis and crystal and electronic structures- of RE2Co2AlC (RE = La, Pr, Nd)
Source: Royal Society of Chemistry journal article supplement (doi:10.1039/d3dt01877f), 2023-01-01
Supplement: d3dt01877f1.pdf [file d3dt01877f1.pdf]

## Supplementary materials

### Extending interstitial tetrelides into carbides: synthesis, crystal, and electronic structure of $\text{RE}_2\text{Co}_2\text{AlC}$ ( $\text{RE}=\text{La}, \text{Pr}, \text{Nd}$ )

*Sergey N. Nesterenko, Anna I. Tursina, Alexey N. Kuznetsov*

*Department of Chemistry, Lomonosov Moscow State University, 119991 Moscow, RUSSIA*

**Figure S1.** Micrographs of the bulk samples: a) as-cast  $\text{Pr}_2\text{Co}_2\text{Al}$ , b) as-cast  $\text{Nd}_2\text{Co}_2\text{Al}$ , c) heat-treated  $\text{Pr}_2\text{Co}_2\text{AlC}$ , d) heat-treated  $\text{Nd}_2\text{Co}_2\text{AlC}$

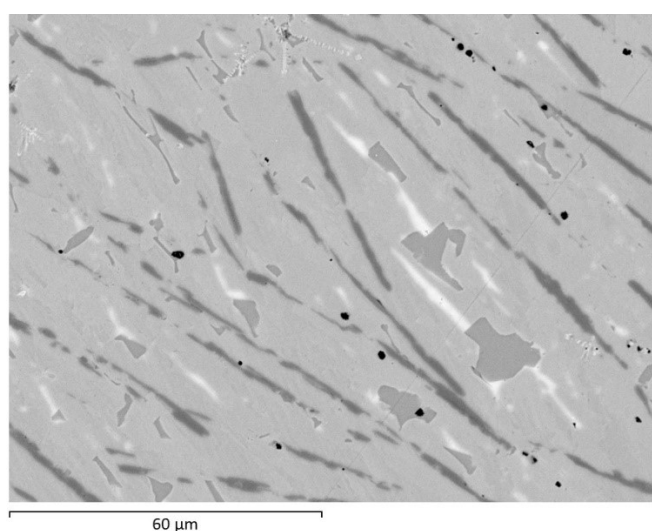

***a***

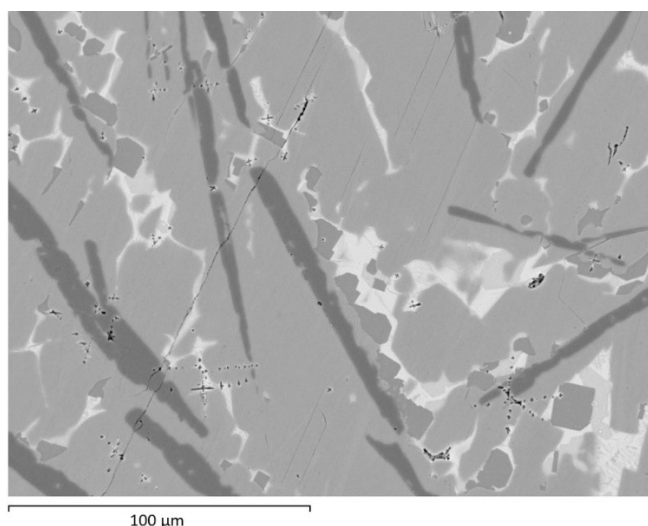

***b***

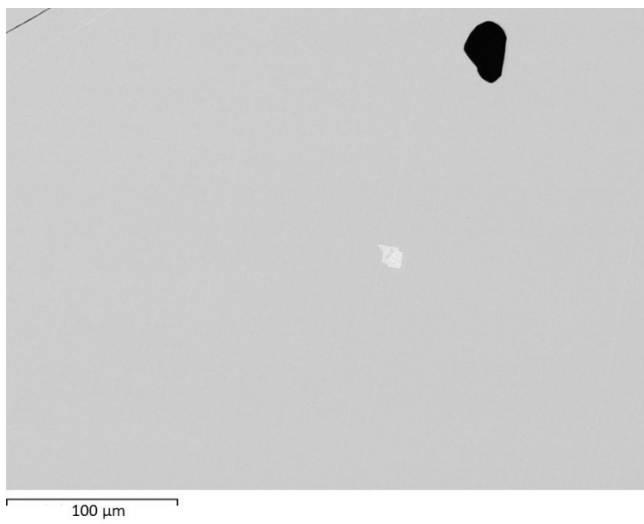

*c*

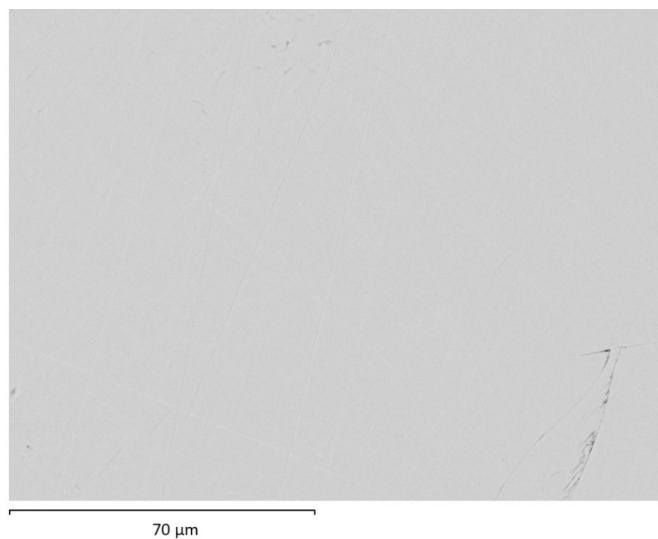

*d*
